# Supplementary material for: Identification of Candidate Chemosensory Gene Families by Head Transcriptomes Analysis in the Mexican Fruit Fly, Anastrepha ludens Loew (Diptera: Tephritidae)
Source: MDPI journal article supplement (doi:10.3390/ijms231810531), 2022-09-11
Supplement: s1 [file s1]

# Supplementary Information for

## Identification of candidate chemosensory gene families by head transcriptomes analysis in the Mexican fruit fly, *Anastrepha ludens* Loew (Diptera: Tephritidae).

Obdulia L. Segura-León <sup>1,\*</sup>; Brenda Torres-Huerta <sup>1,\*</sup>; Alan Rubén Estrada-Pérez<sup>2</sup>; Juan Cibrián-Tovar<sup>1</sup>; Fidel de la Cruz Hernández-Hernández<sup>3</sup>; José Luis Cruz-Jaramillo<sup>4</sup>; José Salvador Meza-Hernández <sup>5</sup>; Fabián Sánchez-Galicia<sup>6</sup>

<sup>1</sup> Entomology and Acarology Program, Colegio de Postgraduados Campus Montecillo, Mexico-Texcoco, km. 36.5, C.P. 56230, State of Mexico, Mexico.

<sup>2</sup> Escuela Superior de Medicina (ESM), Instituto Politécnico Nacional. Casco de Santo Tomas, Miguel Hidalgo, C.P. 11340, Mexico City, Mexico.

<sup>3</sup> Department of Infectomics and Molecular Pathogenesis, Center for Research and Advanced Studies (CINVESTAV-IPN), Mexico City, Mexico.

<sup>4</sup> Bioinformatics and Technologies Department. Solaria Biodata. Col del Valle Centro, Benito Juarez, C.P. 03100, Mexico City, Mexico.

<sup>5</sup> Programa Operativo de Moscas, SENASICA-SADER/IICA, Metapa de Dominguez, Chiapas, Mexico.

<sup>6</sup> Servicio Nacional de Sanidad Inocuidad y Calidad Agroalimentaria, Secretaría de Agricultura y Desarrollo Rural.

**\* Correspondence:**

**sleon@colpos.mx (O.L.S.-L.)**

**torres.brenda@colpos.mx (B.T.-H.)**

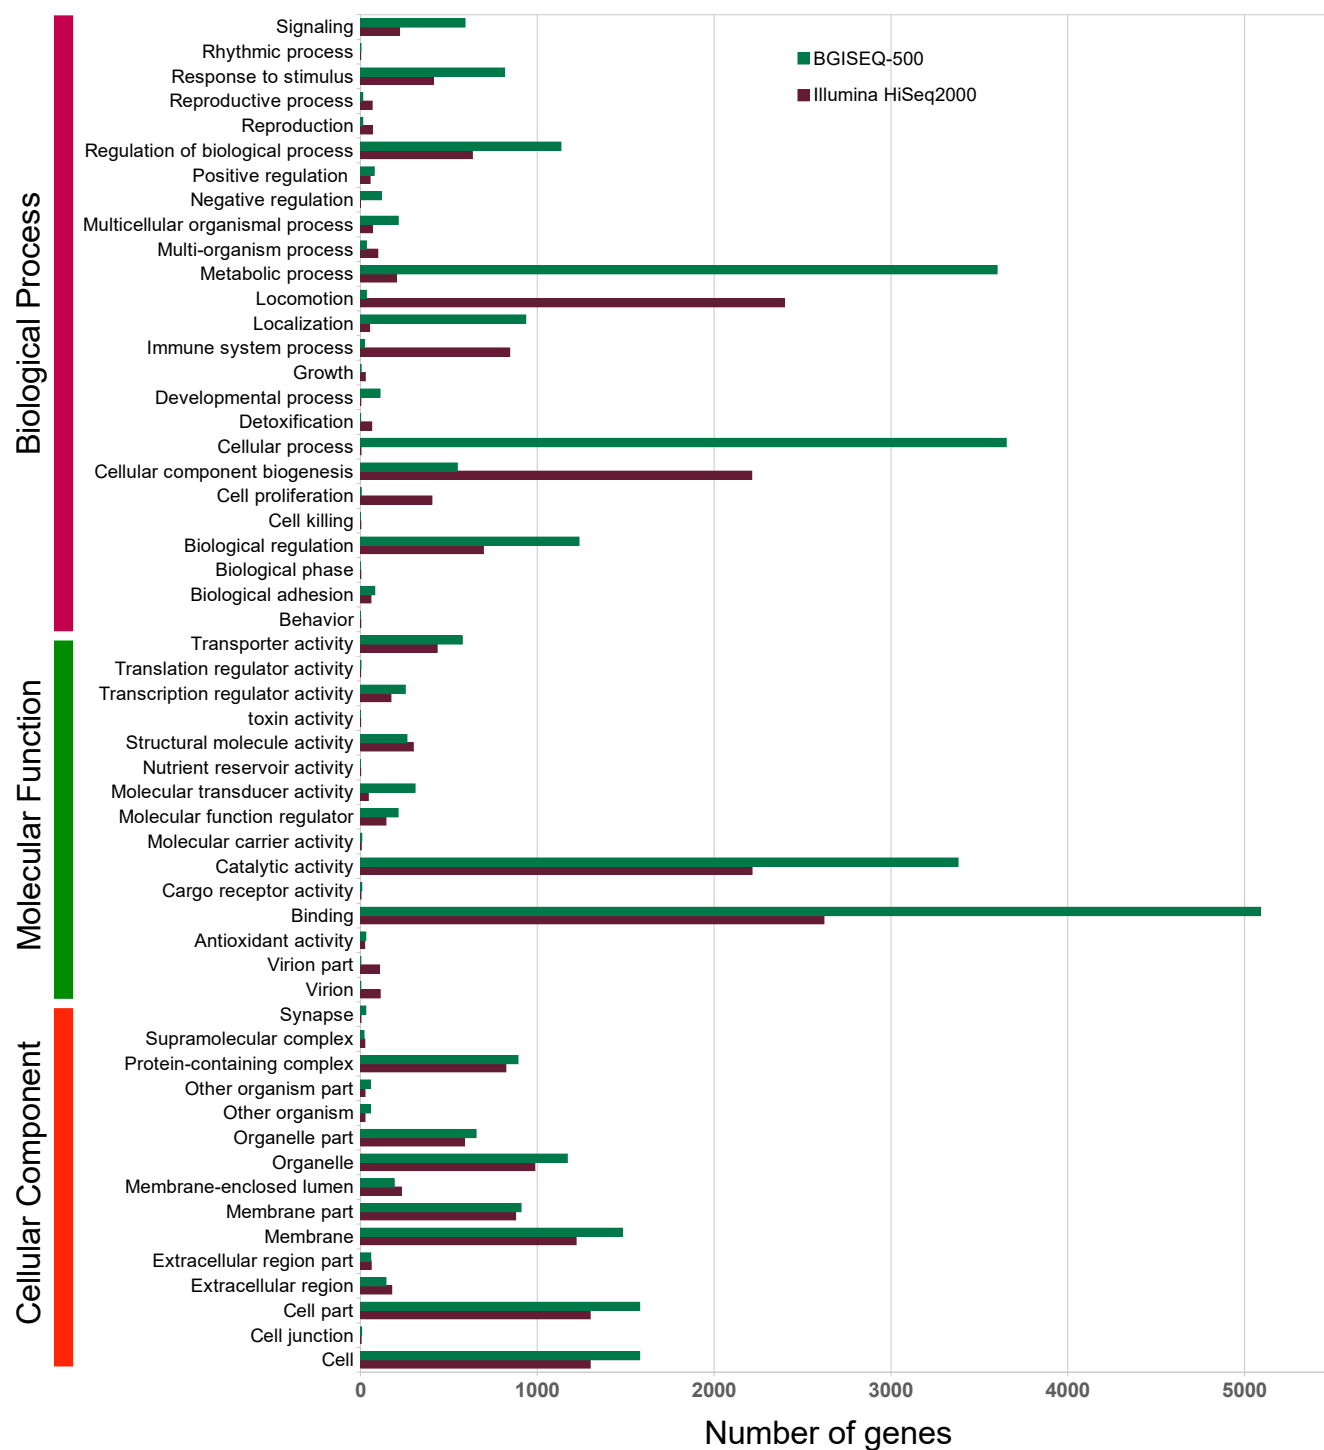

**Figure S1.** GO term distribution of the 5,462 *A. ludens* unigenes obtained with the Illumina HiSeq2000 platform and the 7,383 unigenes obtained with the BGISEQ-500 platform classified into the three Gene Ontology (GO) categories of biological process, cellular component and molecular function.

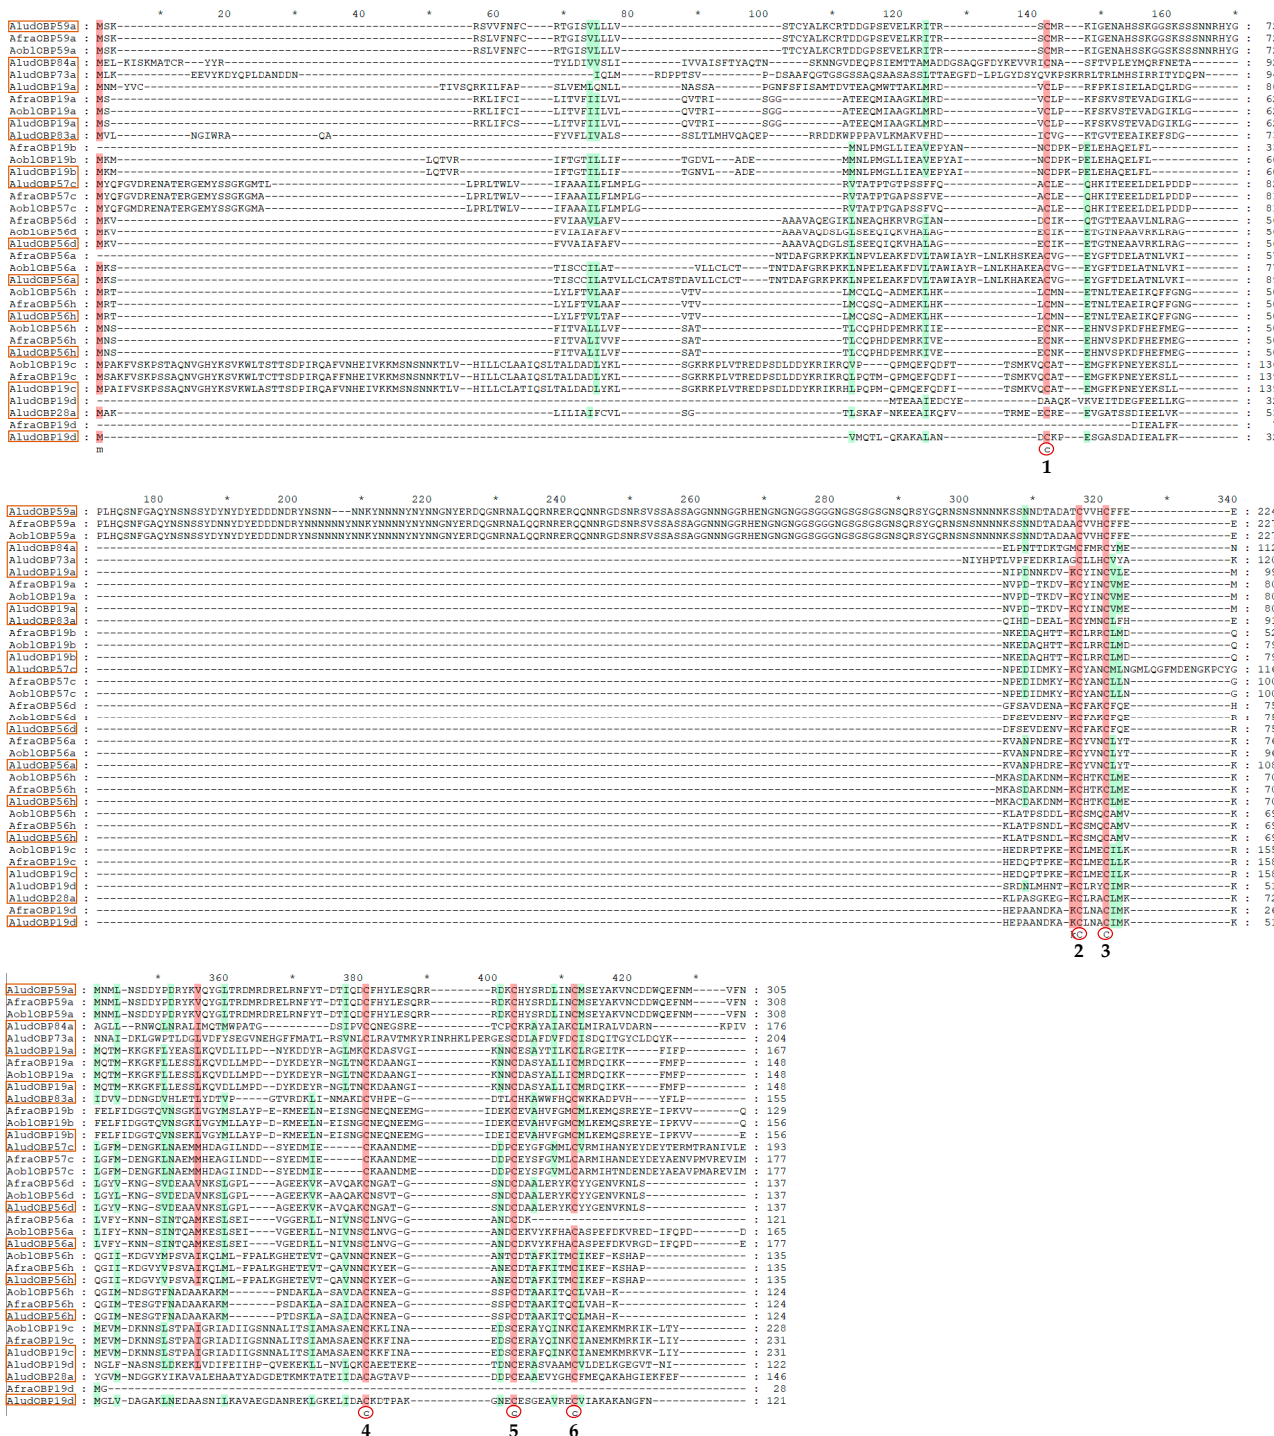

**Figure S2.** Multiple sequence alignment of *A. ludens* classic OBPs. Amino acid sequences were aligned by Clustal Omega and edited using Genodoc. Color boxes show conserved residues.



**Table S1.** Resume Illumina HiSeq2000 sequencing and assembly of of five *A. ludens* libraries

| Libraries               | RIN values | Media length (bp) | Clean reads | GC%     | Q20   | Q30   | Tasa duplicación |
|-------------------------|------------|-------------------|-------------|---------|-------|-------|------------------|
| 1                       | 5.7        | 75                | 6,269,838   | 27.60   | 94.71 | 86.69 | 86.69            |
| 2                       | 5.7        | 75                | 5,923,008   | 39.84   | 90.36 | 79.50 | 79.50            |
| 3                       | 5.9        | 75                | 8,124,304   | 39.23   | 91.23 | 81.41 | 81.41            |
| 4                       | 6          | 75                | 4,602,654   | 39.93   | 95.04 | 87.00 | 87.00            |
| 5                       | 6          | 75                | 9,213,200   | 45.18   | 90.54 | 80.61 | 80.61            |
|                         |            |                   |             |         |       |       |                  |
| Ensamble <i>de novo</i> |            | Transcritos       | Unigenes    | LM (pb) | N30   | N50   | GC%              |
|                         |            | 24,368            | 21,103      | 359     | -     | 880   | 38.56            |

**Table S2.** Resume BGISEQ-500 sequencing and assembly of of six *A. ludens* libraries

| Libraries               | RIN values | Media length (bp) | Clean reads | GC%     | Q20    | Q30    | Tasa duplicación |
|-------------------------|------------|-------------------|-------------|---------|--------|--------|------------------|
| MCLL-R1                 | 6.4        | 99pb              | 45,865,416  | 39.74   | 97.46% | 90.03% | 2.06             |
| MCLL-R2                 | 6.2        | 99pb              | 48,235,940  | 39.74   | 97.62% | 90.48% | 2.63             |
| MCLL-R3                 | 6.2        | 99pb              | 48,353,610  | 40.18   | 97.75% | 90.96% | 2.98             |
| MSLL-R1                 | 6          | 99pb              | 48,346,156  | 39.30   | 97.79% | 91.02% | 2.86             |
| MSLL-R2                 | 6          | 99pb              | 48,657,144  | 40.07   | 97.63% | 90.53% | 3.22             |
| MSLL-R3                 | 6.2        | 99pb              | 48,201,102  | 39.14   | 97.73% | 90.89% | 3.37             |
|                         |            |                   |             |         |        |        |                  |
| Ensamble <i>de novo</i> |            | Transcritos       | Unigenes    | LM (pb) | N30    | N50    | GC%              |
|                         |            | 269,924           | 158,693     | 358     | 2,619  | 1,245  | 36.85            |

**Table S3.** Best Blastp match of *A. ludens* candidate OBPs

| Gene            | ORF (aa) | Type ORF | SP   | Group   | Best Blastp Match |            |                               |           |              |
|-----------------|----------|----------|------|---------|-------------------|------------|-------------------------------|-----------|--------------|
|                 |          |          |      |         | Name              | Acc. No.   | Species                       | Evalue    | Identity (%) |
| AludOBP8a       | 156      | C        | 1-22 | Minus-C | OBP8a             | A0A1D8QLL7 | <i>Anastrepha fraterculus</i> | 0         | 98.07        |
| AludOBP19a1     | 149      | 5p       | No   | Classic | OBP19a            | A0A6M9TZQ0 | <i>Zeugodacus tau</i>         | 2.50E-85  | 82.99        |
| AludOBP19a2     | 149      | C        | 1-27 | Classic | OBP19a            | A0A1D8QLH6 | <i>Anastrepha obliqua</i>     | 1.51E-104 | 99.32        |
| AludOBP19b      | 157      | C        | 1-25 | Classic | OBP19b            | A0A1D8QLJ0 | <i>Anastrepha obliqua</i>     | 6.03E-109 | 97.44        |
| AludOBP19c      | 232      | C        | No   | Classic | OBP19c            | A0A1D8QLL9 | <i>Anastrepha fraterculus</i> | 8.09E-165 | 95.24        |
| AludOBP19d1     | 122      | C        | No   | Classic | OBP19d2           | A0A6M9TZR3 | <i>Zeugodacus tau</i>         | 8.07E-34  | 50.43        |
| AludOBP19d2     | 110      | I        | No   | Classic | OBP19d2           | A0A3G2LEG3 | <i>Bactrocera minax</i>       | 0         | 50.48        |
| AludOBP28a      | 147      | C        | 1-21 | Classic | OBP28a            | A0A3G2LEG5 | <i>Bactrocera minax</i>       | 3.14E-70  | 69.39        |
| AludOBP49a1     | 232      | 5p       | 1-28 | Plus-C  | OBP49a            | A0A1D8QLL5 | <i>Anastrepha fraterculus</i> | 1.64E-152 | 93.75        |
| AludOBP49a2     | 184      | C        | 1-26 | Plus-C  | OBP49a2           | A0A1D8QLH9 | <i>Anastrepha obliqua</i>     | 6.25E-128 | 98.31        |
| AludOBP50a      | 126      | I        | 1-19 | Plus-C  | OBP50a            | A0A1D8QLI9 | <i>Anastrepha obliqua</i>     | 0         | 92.56        |
| AludOBP50e      | 215      | 5p       | 1-21 | Plus-C  | OBP50e            | A0A1D8QLI2 | <i>Anastrepha obliqua</i>     | 1.28E-109 | 98.71        |
| AludOBP56a      | 178      | C        | 1-25 | Classic | OBP56a            | A0A1L2JIV6 | <i>Anastrepha obliqua</i>     | 1.97E-112 | 89.83        |
| AludOBP56d      | 138      | C        | 1-19 | Classic | OBP56d1           | A0A1D8QLK6 | <i>Anastrepha obliqua</i>     | 0         | 94.83        |
| AludOBP56h1     | 150      | 5p       | 1-37 | Classic | OBP56h1           | A0A1D8QLM0 | <i>Anastrepha fraterculus</i> | 2.99E-95  | 97.78        |
| AludOBP56h2     | 125      | C        | 1-20 | Classic | OBP56h2           | A0A1D8QLM2 | <i>Anastrepha fraterculus</i> | 7.04E-85  | 95.97        |
| AludOBP57c      | 129      | C        | No   | Classic | OBP57c            | A0A1D8QLM5 | <i>Anastrepha fraterculus</i> | 3.69E-70  | 92.86        |
| AludOBP59a      | 306      | C        | 1-27 | Classic | OBP59a            | A0A1D8QLK1 | <i>Anastrepha obliqua</i>     | 0         | 98.05        |
| AludOBP73a      | 267      | C        | No   | Classic | OBP73a            | A0A6M9TZR8 | <i>Zeugodacus tau</i>         | 3.04E-84  | 60.49        |
| AludOBP83a      | 156      | C        | 1-32 | Classic | OBP83a            | A0A0G2UGI4 | <i>Bactrocera dorsalis</i>    | 4.49E-104 | 90.32        |
| AludOBP83cd     | 271      | 5p       | No   | Dimer   | OBP83cd           | A0A1D8QLM6 | <i>Anastrepha fraterculus</i> | 5.35E-179 | 97.92        |
| AludOBP83g      | 143      | C        | 1-18 | Classic | OBP83g            | A0A1D8QLM7 | <i>Anastrepha fraterculus</i> | 0         | 97.52        |
| AludOBP83ef     | 282      | C        | 1-32 | Dimer   | OBP83ef           | A0A1D8QLK5 | <i>Anastrepha obliqua</i>     | 0         | 99.21        |
| AludOBP84a      | 177      | C        | No   | Classic | GOBP84a           | A0A1D6Y6I5 | <i>Zeugodacus tau</i>         | 0         | 70.19        |
| AludOBP99a1     | 154      | 5p       | 1-29 | Minus-C | OBP99a            | W8ASY6     | <i>Ceratitis capitata</i>     | 6.55E-101 | 100          |
| AludOBP99a-like | 135      | I        | 1-22 | Minus-C | OBP99a            | A0A0Y0P9P1 | <i>Anastrepha fraterculus</i> | 4.29E-52  | 70.94        |
| AludOBP99a2     | 108      | C        | No   | Minus-C | OBP99a            | A0A1D8QLK7 | <i>Anastrepha obliqua</i>     | 6.99E-75  | 100          |
| AludOBP99a3     | 149      | 5p       | 1-23 | Minus-C | OBP99a            | W8BYY3     | <i>Ceratitis capitata</i>     | 1.54E-105 | 99.32        |
| AludOBP99b      | 173      | C        | No   | Minus-C | OBP99b            | A0A1D8QLN0 | <i>Anastrepha fraterculus</i> | 0         | 98.68        |
| AludOBP99c      | 102      | C        | No   | Minus-C | OBP99c            | A0A1D8QLN2 | <i>Anastrepha fraterculus</i> | 1.05E-69  | 99.01        |
| AludOBP99d      | 127      | C        | No   | Minus-C | OBP99d            | A0A1D8QLN1 | <i>Anastrepha fraterculus</i> | 0         | 98.4         |

ORF: Open Reading Frame, C: complete, 5p: 5prime partial, I: internal partial; SP: signal peptide

**Table S4.** Best Blastp match of *A. ludens* candidate CSPs.

| Gene       | ORF<br>(aa) | Type<br>ORF | Best Blastp Match UniprotKB |             |                            |           |                 |
|------------|-------------|-------------|-----------------------------|-------------|----------------------------|-----------|-----------------|
|            |             |             | Name                        | Acc. No.    | Species                    | Evalue    | Identity<br>(%) |
| AludCSP1   | 129         | Complete    | CSP1                        | A0A6M9TZS5  | <i>Zeugodacus tau</i>      | 1.24E-076 | 87.5            |
| AludCSP2   | 141         | Complete    | CSP2                        | AYN70622    | <i>Bactrocera minax</i>    | 1E-080    | 92.13           |
| AludCSP4   | 126         | Complete    | CSP4                        | A0A6M9U045  | <i>Zeugodacus tau</i>      | 1.99E-066 | 88.28           |
| Gene       | ORF<br>(aa) | Type<br>ORF | Best Blastp Match NCBI      |             |                            |           |                 |
|            |             |             | Name                        | Acc. No.    | Species                    | Evalue    | Identity<br>(%) |
| AludCSP3-1 | 51          | 3 partial   | CSP                         | QKN21121    | <i>Bactrocera dorsalis</i> | 5e-19     | 88.37%          |
| AludCSP3-2 | 149         | Complete    | uncharacterized             | XP011208558 | <i>Bactrocera dorsalis</i> | 3e-73     | 79.87%          |

**Table S5.** The Blastp match of *A. ludens* candidate SNMPs.

| Gene       | ORF<br>(aa) | Type<br>ORF | Transmembrane<br>helices | Best Blastp Match |            |                             |         |              |
|------------|-------------|-------------|--------------------------|-------------------|------------|-----------------------------|---------|--------------|
|            |             |             |                          | Name              | Acc. No.   | Species                     | E-value | Identity (%) |
| AludSNMP1b | 509         | Complete    | 1: 20-37<br>2: 466-488   | SNMP1             | W8C9T0     | <i>Ceratitidis capitata</i> | 0       | 90.89        |
| AludSNMP2  | 630         | Complete    | 1: 79-101<br>2: 595-617  | SNMP2             | A0A034WBN1 | <i>Bactrocera dorsalis</i>  | 0       | 95.49        |

**Table S6.** Best Blastp match of *A. ludens* candidate ORs

| Gene                   | ORF (aa) | Type ORF | TMH | Best Blastp Match UniprotKB |                  |                              |           |              | Best Blastp Match NCBI |                  |                             |           |              |
|------------------------|----------|----------|-----|-----------------------------|------------------|------------------------------|-----------|--------------|------------------------|------------------|-----------------------------|-----------|--------------|
|                        |          |          |     | Name                        | Accession number | Species                      | Evalue    | Identity (%) | Name                   | Accession number | Species                     | Evalue    | Identity (%) |
| <b>AludOR10a</b>       | 495      | C        | 7   | OR10a                       | A0A6M9TZ65       | <i>Bactrocera dorsalis</i>   | 0         | 71.27        | unnamed                | CAD7012964       | <i>Ceratitidis capitata</i> | 0         | 71.84        |
| <b>AludOR13a</b>       | 450      | C        | 6   | OR13a1                      | A0A6M9TZJ2       | <i>Zeugodacus tau</i>        | 0         | 76.3         | OR13a-like             | XP036345084      | <i>Rhagoletis pomonella</i> | 0         | 79.78        |
| <b>AludOR22c</b>       | 398      | C        | 6   | LOC105230821                | A0A6I9VI76       | <i>Bactrocera dorsalis</i>   | 0         | 67.5         | OR22c                  | XP036328669      | <i>Rhagoletis pomonella</i> | 0         | 71.57        |
| <b>AludOR24a</b>       | 397      | C        | 7   | LOC105223483                | A0A6I9UW31       | <i>Bactrocera dorsalis</i>   | 0         | 73.55        | OR24a-like             | XP036347045      | <i>Rhagoletis pomonella</i> | 0         | 74.62        |
| <b>AludOR2a</b>        | 357      | C        | 4   | OR19a                       | A0A6M9TYG5       | <i>Zeugodacus cucurbitae</i> | 0         | 76.11        | OR2a-like              | XP039962547      | <i>Bactrocera tryoni</i>    | 0         | 76.4         |
| <b>AludOR30a-like1</b> | 287      | 3p       | 5   | BlatOR30a                   | A0A5H2X5F2       | <i>Bactrocera latifrons</i>  | 4.59E-60  | 38.32        | OR2-like               | XP036342137      | <i>Rhagoletis pomonella</i> | 2.08E-114 | 76.47        |
| <b>AludOR30a-like2</b> | 377      | C        | 5   | BlatOR30a                   | A0A5H2X5F2       | <i>Bactrocera latifrons</i>  | 3.97E-81  | 37.63        | unnamed                | CAD6993154       | <i>Ceratitidis capitata</i> | 2.05E-101 | 38.87        |
| <b>AludOR33ab1</b>     | 378      | C        | 6   | OR33ab2                     | A0A3G2LEJ3       | <i>Bactrocera minax</i>      | 0         | 81.38        | unnamed                | CAD6998182       | <i>Ceratitidis capitata</i> | 0         | 80.69        |
| <b>AludOR33ab2</b>     | 390      | C        | 5   | OR33ab1-1                   | A0A3G2LEI7       | <i>Bactrocera minax</i>      | 0         | 76.86        | OR33b-like             | XP036329522      | <i>Rhagoletis pomonella</i> | 0         | 81.49        |
| <b>AludOR42a</b>       | 419      | C        | 6   | OR42a                       | A0A6M9TZI9       | <i>Zeugodacus tau</i>        | 0         | 65.12        | OR7a-like              | XP039959863      | <i>Bactrocera tryoni</i>    | 0         | 63.47        |
| <b>AludOR43a3</b>      | 369      | C        | 6   | ZcucOR43a-3                 | A0A5H2WW15       | <i>Zeugodacus cucurbitae</i> | 7.08E-152 | 57.07        | OR2-like               | XP036328946      | <i>Rhagoletis pomonella</i> | 0         | 65.16        |
| <b>AludOR45a</b>       | 390      | C        | 5   | LOC105232464                | A0A6I9VKB7       | <i>Bactrocera dorsalis</i>   | 0         | 76.41        | OR45a-like             | XP036345921      | <i>Rhagoletis pomonella</i> | 0         | 78.46        |
| <b>AludOR47b</b>       | 452      | C        | 7   | OR47b                       | A0A6M9TZ74       | <i>Bactrocera dorsalis</i>   | 0         | 72.89        | OR47b                  | XP039969307      | <i>Bactrocera tryoni</i>    | 0         | 72.67        |
| <b>AludOR49a</b>       | 397      | C        | 6   | OR49a                       | A0A6M9TYG4       | <i>Bactrocera correcta</i>   | 0         | 82.7         | OR49a-like             | XP039950622      | <i>Bactrocera tryoni</i>    | 0         | 82.7         |
| <b>AludOR49b</b>       | 394      | C        | 6   | OR49b-1                     | A0A0G2UEX4       | <i>Bactrocera dorsalis</i>   | 0         | 90.3         | OR49b                  | XP036330492      | <i>Rhagoletis pomonella</i> | 0         | 91.91        |
| <b>AludOR5</b>         | 385      | C        | 7   | OR5-1                       | A0A3G2LEM6       | <i>Bactrocera minax</i>      | 0         | 75.33        | OR33b-like             | XP036336914      | <i>Rhagoletis pomonella</i> | 0         | 81.3         |



| Gene                   | ORF<br>(aa) | Type<br>ORF | TMH | Best Blastp Match UniprotKB |                     |                              |           |                 | Best Blastp Match NCBI |                     |                             |           |                 |
|------------------------|-------------|-------------|-----|-----------------------------|---------------------|------------------------------|-----------|-----------------|------------------------|---------------------|-----------------------------|-----------|-----------------|
|                        |             |             |     | Name                        | Accession<br>number | Species                      | Evalue    | Identity<br>(%) | Name                   | Accession<br>number | Species                     | Evalue    | Identity<br>(%) |
| <b>AludOR59a-like</b>  | 365         | 5p          | 6   | OR59a                       | A0A6I9VFX8          | <i>Bactrocera dorsalis</i>   | 3.22E-95  | 66.96           | OR59a-like             | XP039957889         | <i>Bactrocera tryoni</i>    | 0         | 68.49           |
| <b>AludOR59a1</b>      | 392         | C           | 5   | OR59a.1                     | A0A6M9TYW4          | <i>Bactrocera dorsalis</i>   | 0         | 77.78           | OR59a-like             | XP036332512         | <i>Rhagoletis pomonella</i> | 0         | 84.95           |
| <b>AludOR59b-like</b>  | 457         | C           | 6   | OR59B                       | W8C1I4              | <i>Ceratitis capitata</i>    | 6.85E-166 | 76.6            | OR7a-like              | XP036342571         | <i>Rhagoletis pomonella</i> | 0         | 84.1            |
| <b>AludOR63a</b>       | 380         | C           | 7   | LOC105225172                | A0A6I9VEW0          | <i>Bactrocera dorsalis</i>   | 0         | 73.01           | OR63a-like             | XP036336255         | <i>Rhagoletis pomonella</i> | 0         | 80.26           |
| <b>AludOR63a-like1</b> | 413         | C           | 7   | OR63a-1                     | A0A0G2UMW5          | <i>Bactrocera dorsalis</i>   | 0         | 64.98           | OR63a-like             | XP039963175         | <i>Bactrocera tryoni</i>    | 0         | 65.46           |
| <b>AludOR63a-like2</b> | 417         | C           | 5   | OR63a.3                     | A0A6M9TZ99          | <i>Bactrocera dorsalis</i>   | 0         | 73.14           | OR63a-like             | XP036336885         | <i>Rhagoletis pomonella</i> | 0         | 76.98           |
| <b>AludOR67c</b>       | 413         | C           | 6   | BlatOR67c-v1                | A0A5H2X5I6          | <i>Bactrocera latifrons</i>  | 0         | 61.44           | OR67c-like             | XP036327494         | <i>Rhagoletis pomonella</i> | 0         | 75.19           |
| <b>AludOR67d1</b>      | 388         | C           | 6   | BlatOR67d-3-v1              | A0A5H2X9Q8          | <i>Bactrocera latifrons</i>  | 0         | 76.23           | OR67d-like             | XP036342589         | <i>Rhagoletis pomonella</i> | 0         | 77.02           |
| <b>AludOR67d2</b>      | 394         | C           | 6   | ZcucOR67d-1-v1              | A0A5H2WZD3          | <i>Zeugodacus cucurbitae</i> | 0         | 70.62           | OR67d-like             | XP036336897         | <i>Rhagoletis pomonella</i> | 0         | 79.9            |
| <b>AludOR69a1</b>      | 413         | C           | 6   | OR69a.1                     | A0A6M9TZU3          | <i>Zeugodacus tau</i>        | 0         | 73.91           | OR69a                  | XP036327301         | <i>Rhagoletis pomonella</i> | 0         | 78.94           |
| <b>AludOR69a2</b>      | 425         | C           | 6   | OR69a.2                     | A0A6M9TZP3          | <i>Zeugodacus tau</i>        | 5.94E-175 | 55.66           | OR69a                  | XP036327296         | <i>Rhagoletis pomonella</i> | 0         | 66.75           |
| <b>AludOR71a1</b>      | 354         | 5p          | 4   | OR94b                       | A0A0L0BUZ0          | <i>Lucilia cuprina</i>       | 4.79E-106 | 43.35           | OR94a-like             | XP036332422         | <i>Rhagoletis pomonella</i> | 6.97E-136 | 53.26           |
| <b>AludOR71a2</b>      | 388         | 5p          | 7   | OR94b                       | A0A0L0BUZ0          | <i>Lucilia cuprina</i>       | 1.10E-114 | 45.29           | OR94a-like             | XP036332337         | <i>Rhagoletis pomonella</i> | 0         | 70.47           |
| <b>AludOR74a</b>       | 402         | C           | 5   | OR74a1                      | A0A3G2LEK3          | <i>Bactrocera minax</i>      | 0         | 68.31           | OR74a-like             | XP036329321         | <i>Rhagoletis pomonella</i> | 0         | 74.81           |
| <b>AludOR74a-like1</b> | 402         | C           | 7   | OR                          | A0A1I8M0X2          | <i>Musca domestica</i>       | 6.71E-87  | 36.07           | OR74a-like             | XP036337022         | <i>Rhagoletis pomonella</i> | 1.55E-139 | 72.8            |
| <b>AludOR74a2</b>      | 415         | C           | 5   | OR74a                       | A0A6M9TZI7          | <i>Bactrocera dorsalis</i>   | 0         | 71.74           | OR74a-like             | XP036344413         | <i>Rhagoletis pomonella</i> | 0         | 75.42           |
| <b>AludOR7a6</b>       | 218         | 3p          | 4   | BdorOR42b                   | A0A348AZQ4          | <i>Bactrocera</i>            | 6.68E-107 | 70.19           | OR42b-like             | XP036325260         | <i>Rhagoletis</i>           | 2.16E-117 | 82.78           |

| Gene              | ORF<br>(aa) | Type<br>ORF | TMH | Best Blastp Match UniprotKB |                     |                                |           |                 | Best Blastp Match NCBI |                     |                             |           |                 |
|-------------------|-------------|-------------|-----|-----------------------------|---------------------|--------------------------------|-----------|-----------------|------------------------|---------------------|-----------------------------|-----------|-----------------|
|                   |             |             |     | Name                        | Accession<br>number | Species                        | Evalue    | Identity<br>(%) | Name                   | Accession<br>number | Species                     | Evalue    | Identity<br>(%) |
| <b>AludOR7a7</b>  | 431         | C           | 5   | OR7a.7                      | A0A6M9TZ91          | <i>Bactrocera dorsalis</i>     | 0         | 80.32           | OR7a-like              | XP039960759         | <i>Bactrocera tryoni</i>    | 0         | 80.05           |
| <b>AludOR7a8</b>  | 419         | C           | 6   | OR42a                       | A0A6M9TZI9          | <i>Zeugodacus tau</i>          | 0         | 71.24           | OR7a-like              | XP039959863         | <i>Bactrocera tryoni</i>    | 0         | 69.35           |
| <b>AludOR82a</b>  | 394         | C           | 6   | OR82a                       | A0A6M9TZ86          | <i>Zeugodacus cucurbitae</i>   | 0         | 86.18           | OR82a                  | XP036325270         | <i>Rhagoletis pomonella</i> | 0         | 85.35           |
| <b>AludOR83a1</b> | 476         | 5p          | 7   | LOC105226603                | A0A6I9VJU7          | <i>Bactrocera dorsalis</i>     | 6.11E-163 | 51.55           | OR83a-like             | XP036229332         | <i>Bactrocera oleae</i>     | 0         | 57.82           |
| <b>AludOR85c</b>  | 410         | C           | 6   | LOC105230489                | A0A6I9VAM7          | <i>Bactrocera dorsalis</i>     | 1.55E-166 | 54.96           | unnamed                | CAD6996158          | <i>Ceratitis capitata</i>   | 3.08E-173 | 56.76           |
| <b>AludOR85d2</b> | 110         | 5p          | 1   | OR85d2                      | A0A3G2LEL9          | <i>Bactrocera minax</i>        | 4.16E-55  | 76.15           | OR85d                  | XP039948769         | <i>Bactrocera tryoni</i>    | 2.32E-56  | 77.06           |
| <b>AludOR88a</b>  | 410         | C           | 2   | OR88a                       | A0A6M9U071          | <i>Zeugodacus tau</i>          | 0         | 63.77           | OR88a                  | XP036332705         | <i>Rhagoletis pomonella</i> | 0         | 72.99           |
| <b>AludOR94b2</b> | 407         | C           | 6   | LOC105224900                | A0A6J0RK7           | <i>Bactrocera dorsalis</i>     | 0         | 75.98           | OR94a-like             | XP039966652         | <i>Bactrocera tryoni</i>    | 0         | 75.49           |
| <b>AludORCO</b>   | 474         | C           | 7   | ORCO                        | A0A7H9SRD3          | <i>Procecidochare s utilis</i> | 0         | 96.19           | ORCO                   | XP039970704         | <i>Bactrocera tryoni</i>    | 0         | 95.77           |

ORF: Open Reading Frame, C: complete, 5p: 5prime partial, I: internal partial; THMM: transmembrane helices in proteins

**Table S7. Best Blastp match of *A. ludens* candidate GRs**

| Gene             | ORF<br>(aa) | Type<br>ORF | TMH | Best Blastp Match UniprotKB |                     |                            |          |                 | Best Blastp Match NCBI |                     |                             |          |                 |
|------------------|-------------|-------------|-----|-----------------------------|---------------------|----------------------------|----------|-----------------|------------------------|---------------------|-----------------------------|----------|-----------------|
|                  |             |             |     | Name                        | Accession<br>number | Species                    | Evalue   | Identity<br>(%) | Name                   | Accession<br>number | Species                     | Evalue   | Identity<br>(%) |
| <b>AludGR21a</b> | 450         | C           | 6   | GR21a                       | A0A6M9TZ08          | <i>Bactrocera dorsalis</i> | 0        | 96.44           | GR21a-like             | XP039957155         | <i>Bactrocera tryoni</i>    | 0        | 96.22           |
| <b>AludGR22</b>  | 405         | C           | 8   | GR22                        | W8CBK6              | <i>Ceratitis capitata</i>  | 0        | 82.21           | GR22-like              | XP036221660         | <i>Bactrocera oleae</i>     | 0        | 81.2            |
| <b>AludGR22e</b> | 138         | 5p          | 2   | LOC105231253                | A0A6I9VKH2          | <i>Bactrocera dorsalis</i> | 8.63E-57 | 67.69           | GR22e-like             | XP036329741         | <i>Rhagoletis pomonella</i> | 1.10E-59 | 68.12           |

| Gene              | ORF (aa) | Type ORF | TMH | Best Blastp Match UniprotKB |                  |                                |           |              | Best Blastp Match NCBI |                  |                             |           |              |
|-------------------|----------|----------|-----|-----------------------------|------------------|--------------------------------|-----------|--------------|------------------------|------------------|-----------------------------|-----------|--------------|
|                   |          |          |     | Name                        | Accession number | Species                        | Evalue    | Identity (%) | Name                   | Accession number | Species                     | Evalue    | Identity (%) |
| <b>AludGR28a</b>  | 256      | I        | 4   | LOC105223070                | A0A6I9V844       | <i>Bactrocera dorsalis</i>     | 2.66E-147 | 87.31        | GR28a                  | XP036328377      | <i>Rhagoletis pomonella</i> | 8.02E-156 | 90.77        |
| <b>AludGR28b</b>  | 465      | C        | 7   | Gr28b                       | A0A0K8WM41       | <i>Bactrocera latifrons</i>    | 0         | 82.04        | GR28b                  | XP036214738      | <i>Bactrocera oleae</i>     | 0         | 83.23        |
| <b>AludGR2a</b>   | 416      | C        | 7   | LOC105228627                | A0A6I9V595       | <i>Bactrocera dorsalis</i>     | 0         | 67.8         | GR2a                   | XP036338634      | <i>Rhagoletis pomonella</i> | 0         | 72.49        |
| <b>AludGR33a</b>  | 500      | C        | 8   | Dana\GF14188                | B3MNV7           | <i>Drosophila ananassae</i>    | 5.48E-179 | 52.75        | GR33a                  | XP039952326      | <i>Bactrocera tryoni</i>    | 0         | 70.71        |
| <b>AludGR39b</b>  | 122      | 5p       | 1   | LOC105228630                | A0A6I9V9T1       | <i>Bactrocera dorsalis</i>     | 3.11E-24  | 60.26        | GR39b                  | XP039961112      | <i>Bactrocera tryoni</i>    | 9.04E-30  | 58.51        |
| <b>AludGR43a</b>  | 320      | I        | 5   | Gr43a                       | A0A0B4LEE5       | <i>Drosophila melanogaster</i> | 1.44E-138 | 60.12        | GR43a                  | XP039955593      | <i>Bactrocera tryoni</i>    | 0         | 84.11        |
| <b>AludGR5a</b>   | 172      | 5p       | 3   | GR5a                        | A0A6M9TZC4       | <i>Bactrocera dorsalis</i>     | 1.29E-108 | 87.79        | GR5a                   | XP039965716      | <i>Bactrocera tryoni</i>    | 1.11E-108 | 88.95        |
| <b>AludGR63a</b>  | 483      | C        | 7   | BdorGR63a                   | A0A348AZV9       | <i>Bactrocera dorsalis</i>     | 0         | 89.9         | GR63a                  | XP039964488      | <i>Bactrocera tryoni</i>    | 0         | 89.28        |
| <b>AludGR64a</b>  | 396      | 5p       | 7   | LOC105233094                | A0A6I9W8J0       | <i>Bactrocera dorsalis</i>     | 0         | 80.98        | GR64a-like             | XP039964231      | <i>Bactrocera tryoni</i>    | 0         | 80.15        |
| <b>AludGR64b1</b> | 217      | 5p       | 4   | BlatGR64b                   | A0A5H2X5P1       | <i>Bactrocera latifrons</i>    | 2.67E-137 | 84.82        | GR64b                  | XP036220169      | <i>Bactrocera oleae</i>     | 9.49E-142 | 87.56        |
| <b>AludGR64b2</b> | 219      | I        | 3   | BlatGR64b                   | A0A5H2X5P1       | <i>Bactrocera latifrons</i>    | 2.11E-98  | 77.78        | GR64b                  | XP036337006      | <i>Rhagoletis pomonella</i> | 1.45E-106 | 71.06        |
| <b>AludGR64c</b>  | 420      | 5p       | 7   | LOC105233096                | A0A6I9VR07       | <i>Bactrocera dorsalis</i>     | 0         | 82.14        | GR64c-like             | XP039964232      | <i>Bactrocera tryoni</i>    | 0         | 81.67        |
| <b>AludGR64e</b>  | 468      | C        | 6   | GR64e                       | A0A6M9TYX0       | <i>Zeugodacus cucurbitae</i>   | 0         | 86.33        | GR64b-like             | XP039964233      | <i>Bactrocera tryoni</i>    | 0         | 83.38        |
| <b>AludGR64f</b>  | 513      | C        | 8   | GR64f                       | A0A6M9TYJ9       | <i>Bactrocera correcta</i>     | 0         | 80.51        | GR64f-like             | XP039965713      | <i>Bactrocera tryoni</i>    | 0         | 80.51        |
| <b>AludGR66a</b>  | 524      | C        | 6   | GR                          | A0A7H9SR73       | <i>Procecidochares utilis</i>  | 0         | 75.67        | GR66a                  | XP036338271      | <i>Rhagoletis pomonella</i> | 0         | 81.5         |
| <b>AludGR68a</b>  | 233      | 5p       | 3   | GR32a.2                     | A0A6M9TZD6       | <i>Bactrocera dorsalis</i>     | 4.82E-101 | 63.2         | GR32a-like             | XP036328013      | <i>Rhagoletis pomonella</i> | 3.48E-102 | 64.94        |
| <b>AludGR8a</b>   | 395      | 3p       | 8   | GR08A                       | W8CDW6           | <i>Ceratitis</i>               | 9.17E-167 | 70.12        | GR8a-like              | XP036222468      | <i>Bactrocera oleae</i>     | 0         | 66.32        |

| Gene             | ORF (aa) | Type ORF | TMH | Best Blastp Match UniprotKB |                  |                                              |           |              | Best Blastp Match NCBI |                  |                             |           |              |
|------------------|----------|----------|-----|-----------------------------|------------------|----------------------------------------------|-----------|--------------|------------------------|------------------|-----------------------------|-----------|--------------|
|                  |          |          |     | Name                        | Accession number | Species                                      | Evalue    | Identity (%) | Name                   | Accession number | Species                     | Evalue    | Identity (%) |
| <b>AludGR94a</b> | 397      | C        | 5   | GR94A                       | W8BZD0           | <i>capitata</i><br><i>Ceratitis capitata</i> | 0         | 63.41        | GR94a                  | XP036224220      | <i>Bactrocera oleae</i>     | 0         | 66.92        |
| <b>AludGR98a</b> | 342      | 3p       | 7   | Dmoj\GI24562                | B4K4J9           | <i>Drosophila mojavensis</i>                 | 1.10E-21  | 26.17        | GR98a                  | XP036325256      | <i>Rhagoletis pomonella</i> | 1.37E-146 | 58.84        |
| <b>AludGR98b</b> | 196      | 5p       | 3   | LOC109579632                | A0A6J0RMD9       | <i>Bactrocera dorsalis</i>                   | 1.76E-103 | 75.51        | G98b                   | XP036325255      | <i>Rhagoletis pomonella</i> | 6.60E-118 | 86.24        |

ORF: Open Reading Frame, C: complete, 5p: 5prime partial, I: internal partial; THMM: transmembrane helices in proteins

**Table S8. Best Blastp match of *A. ludens* candidate IRs**

| Gene               | ORF (aa) | Type ORF | TMH | Best Blastp Match UniprotKB |                  |                             |        |              | Best Blastp Match NCBI |                  |                                |        |              |
|--------------------|----------|----------|-----|-----------------------------|------------------|-----------------------------|--------|--------------|------------------------|------------------|--------------------------------|--------|--------------|
|                    |          |          |     | Name                        | Accession number | Species                     | Evalue | Identity (%) | Name                   | Accession number | Species                        | Evalue | Identity (%) |
| <b>AludIR100a</b>  | 392      | I        | 2   | LOC118737125                | XP036323319      | <i>Rhagoletis pomonella</i> | 0      | 80.41        | LOC105231923           | A0A6J0RQF6       | <i>Bactrocera dorsalis</i>     | 0      | 76.98        |
| <b>AludIR21a</b>   | 425      | I        | 4   | IR21a                       | XP011210105      | <i>Bactrocera dorsalis</i>  | 0      | 91.06        | IR21a                  | A0A6I9VG03       | <i>Bactrocera dorsalis</i>     | 0      | 91.11        |
| <b>AludIR25a</b>   | 940      | C        | 3   | IR25a                       | XP039951036      | <i>Bactrocera tryoni</i>    | 0      | 95.75        | GRIK2                  | A0A034WU95       | <i>Bactrocera dorsalis</i>     | 0      | 95.64        |
| <b>AludIR40a</b>   | 815      | C        | 3   | IR40a                       | XP039952224      | <i>Bactrocera tryoni</i>    | 0      | 88.83        | IR40a                  | A0A6M9TY60       | <i>Bactrocera correcta</i>     | 0      | 89.73        |
| <b>AludIR41a</b>   | 674      | C        | 5   | LOC120772140                | XP039956500      | <i>Bactrocera tryoni</i>    | 0      | 80.27        | IR41a                  | A0A6M9TZ93       | <i>Zeugodacus cucurbitae</i>   | 0      | 80.86        |
| <b>AludIR56c</b>   | 183      | I        | 1   | unnamed                     | CAD7011917       | <i>Ceratitis capitata</i>   | 0      | 73.51        | BdorIR56c              | A0A348AZX9       | <i>Bactrocera dorsalis</i>     | 0      | 79.01        |
| <b>AludIR31a</b>   | 566      | 5p       | 2   | IR75a                       | XP039969934      | <i>Bactrocera tryoni</i>    | 0      | 60.27        | LOC115631400           | A0A6J2U9W0       | <i>Drosophila lebanonensis</i> | 0      | 49.23        |
| <b>AludIR75a-2</b> | 543      | I        | 3   | IR75a-like                  | XP036327584      | <i>Rhagoletis pomonella</i> | 0      | 73.84        | IR75a2                 | A0A6M9U0I3       | <i>Zeugodacus tau</i>          | 0      | 65.86        |
| <b>AludIR75a-1</b> | 333      | I        | 3   | IR75a-like                  | XP036327349      | <i>Rhagoletis pomonella</i> | 0      | 90.12        | IR75a1                 | A0A6M9TZ16       | <i>Zeugodacus cucurbitae</i>   | 0      | 91.32        |
| <b>AludIR75d</b>   | 713      | C        | 4   | LOC120778042                | XP039965651      | <i>Bactrocera tryoni</i>    | 0      | 78.63        | IR75d                  | A0A6M9TZX6       | <i>Zeugodacus tau</i>          | 0      | 78.26        |
| <b>AludIR76a</b>   | 672      | C        | 1   | LOC118740053                | XP036327442      | <i>Rhagoletis pomonella</i> | 0      | 85.42        | IR76a                  | A0A5H2WWJ3       | <i>Bactrocera latifrons</i>    | 0      | 83.99        |

| Gene              | ORF (aa) | Type ORF | TMH | Best Blastp Match UniprotKB |                  |                             |        |              | Best Blastp Match NCBI |                  |                              |        |              |
|-------------------|----------|----------|-----|-----------------------------|------------------|-----------------------------|--------|--------------|------------------------|------------------|------------------------------|--------|--------------|
|                   |          |          |     | Name                        | Accession number | Species                     | Evalue | Identity (%) | Name                   | Accession number | Species                      | Evalue | Identity (%) |
| <b>AludIR8a</b>   | 952      | C        | 3   | IR25a                       | XP036324538      | <i>Rhagoletis pomonella</i> | 0      | 85.27        | IR8a                   | A0A5H2X122       | <i>Zeugodacus cucurbitae</i> | 0      | 84.19        |
| <b>AludIR92a</b>  | 718      | C        | 2   | LOC120766544                | XP039948057      | <i>Bactrocera tryoni</i>    | 0      | 70           | IR92a                  | A0A6M9TZR6       | <i>Zeugodacus tau</i>        | 0      | 70.33        |
| <b>AludIR93a</b>  | 866      | C        | 4   | IR93a                       | XP036323735      | <i>Rhagoletis pomonella</i> | 0      | 85.22        | IGRdelta1              | W8BGJ6           | <i>Ceratitis capitata</i>    | 0      | 83.82        |
| <b>AludIR7c</b>   | 626      | C        | 3   | IR-delta                    | XP036320037      | <i>Rhagoletis pomonella</i> | 0      | 73.84        | Lig_chan-Glu           | A0A1I8MBZ8       | <i>Musca domestica</i>       | 0      | 40.35        |
| <b>AludKaiR1D</b> | 875      | 3p       | 2   | IGR-kainate2 iso2           | XP036228939      | <i>Bactrocera oleae</i>     | 0      | 80.81        | IGR-kainate2           | A0A6M9TYN1       | <i>Zeugodacus cucurbitae</i> | 0      | 80.33        |
| <b>AludGluIID</b> | 900      | C        | 3   | IGR-kainate2 iso1           | XP039970451      | <i>Bactrocera tryoni</i>    | 0      | 79.13        | IGR-kainate2           | A0A140CQB9       | <i>Zeugodacus cucurbitae</i> | 0      | 78.97        |

ORF: Open Reading Frame, C: complete, 5p: 5prime partial, I: internal partial; THMM: transmembrane helices in proteins}

**Table S9.** Accession numbers of no receptor chemosensory proteins used in phylogenetic analysis

| OBPs             |                 |                  |            | CSPs             |            | SNMPs            |            |
|------------------|-----------------|------------------|------------|------------------|------------|------------------|------------|
| Accession number | Name            | Accession number | Name       | Accession number | Name       | Accession number | Name       |
| A0A1D8QLL2       | AfraOBP19a      | W8C4V0           | CcapOBP19A | A0A6M9TYW3       | BcorCSP1   | Q7QC49           | AgamSNMP1  |
| A0A1D8QLN3       | AfraOBP19b      | W8AGN5           | CcapOBP56A | A0A6M9TYH9       | BcorCSP2   | Q7Q6R1           | AgamSNMP2  |
| A0A1D8QLL9       | AfraOBP19c      | W8BS14           | CcapOBP56A | A0A6M9TYN6       | BcorCSP3   | A0A6M9TYM0       | BcorSNMP1a |
| A0A0Y0PEE3       | AfraOBP19d-like | W8CBW7           | CcapOBP56D | A0A6M9TYT2       | BcorCSP4   | A0A6M9TY95       | BcorSNMP1b |
| A0A1D8QLL8       | AfraOBP47b      | W8BU34           | CcapOBP56H | B2D0J0           | BdorCSP    | A0A6M9TY93       | BcorSNMP2  |
| A0A1D8QLL5       | AfraOBP49a      | W8C0X8           | CcapOBP56H | A0A6M9TZI3       | BdorCSP3   | A0A0G2UGL0       | BdorSNMP1  |
| A0A1D8QLN5       | AfraOBP50a      | W8C879           | CcapOBP57C | A0A034WWI9       | BdorPEBIII | A0A6M9TZL3       | BdorSNMP1b |
| A0A1D8QLM1       | AfraOBP50e      | W8BYY3           | CcapOBP99A | A0A034W0K7       | BdorPEBIII | A0A034WBN1       | BdorSNMP2  |
| A0A0Y0PI40       | AfraOBP56a-like | W8CD84           | CcapOBP99A | A0A3G2LEE9       | BminCSP2   | A0A0K8V8V4       | BlatSNMP1  |
| A0A1D8QLM3       | AfraOBP56d      | W8C4C0           | CcapOBP99A | QOC63332         | BminCSP3   | A0A0K8VL93       | BlatSNMP2  |
| A0A1D8QLM0       | AfraOBP56h      | W8BAM5           | CcapOBP99A | A0A3G2LEF3       | BminCSP3   | W8BDX2           | CcapSNMP1  |
| A0A1D8QLM2       | AfraOBP56h      | W8BUK4           | CcapOBP99A | A0A3G2LEF5       | BminCSP4   | W8C9T0           | CcapSNMP1  |
| A0A1D8QLM5       | AfraOBP57c      | W8ASY6           | CcapOBP99A | A0A0G2UKC9       | BminCSP4   | W8BAT2           | CcapSNMP2  |

| OBPs             |                 |                  |              | CSPs             |                   | SNMPs            |            |
|------------------|-----------------|------------------|--------------|------------------|-------------------|------------------|------------|
| Accession number | Name            | Accession number | Name         | Accession number | Name              | Accession number | Name       |
| A0A1D8QLM4       | AfraOBP59a      | W8CAL3           | CcapOBP99A   | XP018796406      | U-BlatCSP         | A0A0B4KGL9       | DmelSNMP1  |
| A0A1D8QLM6       | AfraOBP83cd     | E2DAN9           | DmelOBP19a   | XP018784824      | U-BlatCSP         | E1JI63           | DmelSNMP2  |
| A0A1D8QLM9       | AfraOBP83ef     | E2DBA6           | DmelOBP19b   | XP018793511      | P-BlatPEBIII      | A0A0A1XSX8       | ZcucSNMP1  |
| A0A1D8QLM7       | AfraOBP83g      | E2DC56           | DmelOBP19c   | XP014087037      | U-BoleCSP3        | A0A6M9TYQ5       | ZcucSNMP1b |
| A0A1D8QLL7       | AfraOBP8a       | E2DCT2           | DmelOBP19d   | XP039962771      | P-BtryA10         | A0A0A1WYF3       | ZcucSNMP2  |
| A0A1D8QLM8       | AfraOBP99a      | P54195           | DmelOBP28a   | XP039954488      | BtryPEBIII        | A0A6M9TZQ5       | ZtauSNMP1a |
| A0A0Y0P9P1       | AfraOBP99a-like | Q7K084           | DmelOBP44a   | XP039957277      | U-BtryCSP         | A0A6M9TZW7       | ZtauSNMP1b |
| A0A1D8QLN0       | AfraOBP99b      | A1Z875           | DmelOBP46a   | XP039962770      | U-BtryCSP         | A0A6M9TZZ2       | ZtauSNMP2  |
| A0A1D8QLN2       | AfraOBP99c      | A1Z8I9           | DmelOBP47b   | XP4529710        | P-CcapA10         |                  |            |
| A0A1D8QLN1       | AfraOBP99d      | A1Z9Q6           | DmelOBP50e   | XP012158387      | CcapPEBIII        |                  |            |
| A0A1D8QLH6       | AoblOBP19a      | Q8SY61           | DmelOBP56d   | XP004536817      | U-CcapCSP         |                  |            |
| A0A1D8QLJ0       | AoblOBP19b      | A9QI48           | DmelOBP56g   | XP004529711      | U-CcapCSP         |                  |            |
| A0A1D8QLJ9       | AoblOBP19c      | Q9V8Y9           | DmelOBP56h   | NP524121         | DmelA10           |                  |            |
| A0A1D8QLI5       | AoblOBP47b      | Q9V931           | DmelOBP57c   | NP001286808      | DmelA10/PEBIII    |                  |            |
| A0A1D8QLH9       | AoblOBP49a      | Q9W207           | DmelOBP58d   | NP001286870      | U-DmelA10/PEBIII  |                  |            |
| A0A1D8QLJ8       | AoblOBP49a      | Q86BF9           | DmelOBP59a   | AAA21358         | DmelOSD           |                  |            |
| A0A1D8QLI9       | AoblOBP50a      | Q7KUQ3           | DmelOBP73a   | NP001286811      | U-DmelCG30172_A10 |                  |            |
| A0A1D8QLI2       | AoblOBP50e      | P54193           | DmelOBP83a   | AAN71635         | DmelRH70879p_A10  |                  |            |
| A0A1L2JIV6       | AoblOBP56a      | Q9VNL1           | DmelOBP83cd  | QNL15632         | U-PutiCSP         |                  |            |
| A0A1D8QLK4       | AoblOBP56d      | P54194           | DmelOBP84a   | QNL15628         | U-PutiCSP         |                  |            |
| A0A1D8QLK2       | AoblOBP56h      | D1FYI8           | DmelOBP99a   | QNL15630         | U-PutiCSP         |                  |            |
| A0A1D8QLK0       | AoblOBP56h      | D1FYT5           | DmelOBP99b   | XP036319258      | P-RpomA10         |                  |            |
| A0A1D8QLK8       | AoblOBP57c      | A9QJL7           | DmelOBP99c   | XP17473899       | U-RzepCSP         |                  |            |
| A0A1D8QLK1       | AoblOBP59a      | D1FZL5           | DmelOBP99d   | XP011177222      | U-ZcucCSP         |                  |            |
| A0A1D8QLK3       | AoblOBP83cd     | A0A0A1XJZ1       | ZcucOBP19a_0 | A0A6M9TZ15       | ZcucCSP3          |                  |            |
| A0A1D8QLK5       | AoblOBP83ef     | A0A0A1WDN1       | ZcucOBP19a_1 | A0A0A1X6Y2       | ZcucPEBIII        |                  |            |
| A0A1D8QLK9       | AoblOBP83g      | A0A0A1XCI4       | ZcucOBP56a_2 | XP028901610      | ZcucPEBIII-isoX1  |                  |            |
| A0A1D8QLF8       | AoblOBP8a       | A0A0A1X269       | ZcucOBP56a_5 | ALS40433         | U-ZtauA10         |                  |            |

| OBPs             |              |                  |              | CSPs             |          | SNMPs            |      |
|------------------|--------------|------------------|--------------|------------------|----------|------------------|------|
| Accession number | Name         | Accession number | Name         | Accession number | Name     | Accession number | Name |
| A0A1D8QLK7       | AoblOBP99a   | A0A0A1WII5       | ZcucOBP56d_0 | A0A6M9TZS5       | ZtauCSP1 |                  |      |
| A0A1D8QLL4       | AoblOBP99b   | A0A0A1WU34       | ZcucOBP56d_1 | A0A6M9U0F9       | ZtauCSP2 |                  |      |
| A0A1D8QLL3       | AoblOBP99c   | A0A0A1XS85       | ZcucOBP56h_0 | A0A6M9U0Q4       | ZtauCSP3 |                  |      |
| A0A1D8QLL1       | AoblOBP99d   | A0A0A1XCT5       | ZcucOBP56h_1 | A0A6M9U045       | ZtauCSP4 |                  |      |
| A0A034WVR1       | BdorOBP19A   | A0A0A1WWF8       | ZcucOBP57c   |                  |          |                  |      |
| A0A034WLF0       | BdorOBP19A   | A0A0A1XJG7       | ZcucOBP99a_0 |                  |          |                  |      |
| A0A034WQW6       | BdorOBP56A   | A0A0A1XRC5       | ZcucOBP99a_3 |                  |          |                  |      |
| A0A034WTD0       | BdorOBP56D   | A0A0A1X819       | ZcucOBP99a_4 |                  |          |                  |      |
| A0A034WRT9       | BdorOBP56H   | A0A0A1XN26       | ZcucOBP99a_5 |                  |          |                  |      |
| A0A034W3Z7       | BdorOBP57C   | A0A0A1WVQ0       | ZcucOBP99a_6 |                  |          |                  |      |
| A0A034VAP1       | BdorOBP99A   | A0A0A1X1Z8       | ZcucOBP99a_7 |                  |          |                  |      |
| A0A034VWI9       | BdorOBP99A   | A0A1D6Y6I2       | ZtauOBP11    |                  |          |                  |      |
| A0A034WIQ9       | BdorOBP99A   | A0A1D6Y6H0       | ZtauOBP13    |                  |          |                  |      |
| A0A6I9W3H9       | BdorOBP19d   | A0A1D6Y6J3       | ZtauOBP14    |                  |          |                  |      |
| A0A6J0RFI4       | BdorOBP56a   | A0A1D6Y6H9       | ZtauOBP15    |                  |          |                  |      |
| A0A6I9UKC5       | BdorOBP56d   | A0A1D6Y6K4       | ZtauOBP16    |                  |          |                  |      |
| A0A6I9VG65       | BdorOBP56h   | A0A1D6Y6J4       | ZtauOBP18    |                  |          |                  |      |
| S5R7I3           | BdorOBP7     | A0A1D6Y6J5       | ZtauOBP19    |                  |          |                  |      |
| A0A6I9VL90       | BdorOBP70    | A0A1D6Y6I6       | ZtauOBP20    |                  |          |                  |      |
| A0A0K8VTX5       | BlatOBP19a_0 | A0A1D6Y6J0       | ZtauOBP21    |                  |          |                  |      |
| A0A0K8TYL8       | BlatOBP19a_1 | A0A1D6Y6J1       | ZtauOBP22    |                  |          |                  |      |
| A0A0K8VJ10       | BlatOBP56a_4 | A0A1D6Y6K3       | ZtauOBP24    |                  |          |                  |      |
| A0A0K8VU37       | BlatOBP56d_0 | A0A1D6Y6I9       | ZtauOBP25    |                  |          |                  |      |
| A0A0K8V5Y3       | BlatOBP56h_0 | A0A172BZK8       | ZtauOBP3     |                  |          |                  |      |
| A0A0K8W7T9       | BlatOBP56h_1 | A0A172BZK6       | ZtauOBP4     |                  |          |                  |      |
| A0A0K8U7K1       | BlatOBP57c_1 | A0A172BZK9       | ZtauOBP5     |                  |          |                  |      |
| A0A0K8WLW4       | BlatOBP99a_1 | A0A1D6Y6H3       | ZtauOBP7     |                  |          |                  |      |
| A0A0K8VEE3       | BlatOBP99a_2 | A0A1D6Y6I5       | ZtauOBP8     |                  |          |                  |      |

| OBPs             |              | CSPs             |      | SNMPs            |      |
|------------------|--------------|------------------|------|------------------|------|
| Accession number | Name         | Accession number | Name | Accession number | Name |
| A0A0K8UV06       | BlatOBP99a_3 |                  |      |                  |      |
| A0A0K8VWQ2       | BlatOBP99a_4 |                  |      |                  |      |
| A0A0K8WLU2       | BlatOBP99a_5 |                  |      |                  |      |
| A0A0K8VYN4       | BlatOBP99a_7 |                  |      |                  |      |

OBPs: Odorant Binding Proteins; CSPs: Chemosensory Proteins; SNMPs: Sensory Neuronal Membrane Proteins;

**Table S10.** Accession numbers of receptor chemosensory proteins used in phylogenetic analysis

| ORs              |              |                  |                        | GRs              |                | IRs              |             |
|------------------|--------------|------------------|------------------------|------------------|----------------|------------------|-------------|
| Accession number | Name         | Accession number | Name                   | Accession number | Name           | Accession number | Name        |
| A0A6M9TY59       | BcorOR10a    | XP036342060      | RpomOR30a_like         | A0A6M9TY81       | BcorGR21a      | A0A6M9TY61       | BcorIR21a   |
| A0A6M9TYC1       | BcorOR13a_1  | XP036336876      | RpomOR30a_like         | A0A6M9TY82       | BcorGR22       | A0A6M9TYI4       | BcorIR25a   |
| A0A6M9TY20       | BcorOR19a    | XP036329676      | RpomOR33b_like         | A0A6M9TY84       | BcorGR28bC     | A0A6M9TY60       | BcorIR40a   |
| A0A6M9TY23       | BcorOR42a    | XP036329522      | RpomOR33b_like         | A0A6M9TZ03       | BcorGR32a_2    | A0A6M9TY63       | BcorIR41a   |
| A0A6M9TY22       | BcorOR43a_1  | XP036336914      | RpomOR33b_like         | A0A6M9TYS5       | BcorGR63a      | A0A6M9TY62       | BcorIR64a   |
| A0A6M9TYT7       | BcorOR43a_4a | XP036348085      | RpomOR42a_like_partial | A0A6M9TYD4       | BcorGR64e      | A0A6M9TYX8       | BcorIR75a_1 |
| A0A6M9TYK4       | BcorOR45a    | XP036325260      | RpomOR42b_like         | A0A6M9TYJ9       | BcorGR64f      | A0A6M9TZ04       | BcorIR75a_2 |
| A0A6M9TYD8       | BcorOR47b    | XP036332306      | RpomOR43a_like         | A0A6M9TZ08       | BdorGR21a      | A0A6M9TYP6       | BcorIR75d   |
| A0A6M9TYG4       | BcorOR49a    | XP036345921      | RpomOR45a_like         | A0A348AZU9       | BdorGR21a_2_v1 | A0A6M9TYA9       | BcorIR76a   |
| A0A6M9TY32       | BcorOR49b    | XP036347151      | RpomOR47b_like_partial | A0A034V2V0       | BdorGR28A      | A0A6M9TYJ7       | BcorIR84a   |
| A0A6M9TY38       | BcorOR59a_1  | XP036322429      | RpomOR49a              | A0A348AZV3       | BdorGR28b      | A0A6M9TYG3       | BcorIR8a    |
| A0A6M9TY34       | BcorOR59a_2  | XP036330492      | RpomOR49b              | A0A0G2UEL7       | BdorGR28b      | A0A6M9TY74       | BcorIR92a   |
| A0A6M9TY36       | BcorOR63a_1  | XP036336799      | RpomOR59a_like         | A0A034WHT2       | BdorGR32A      | A0A6M9TY73       | BcorIR93a   |
| A0A6M9TYY7       | BcorOR63a_3  | XP036332437      | RpomOR59a_like         | A0A034UY90       | BdorGR33A      | A0A0G2UGG7       | BdorGluIID  |
| A0A6M9TYL8       | BcorOR67c_1  | XP036332512      | RpomOR59a_like         | A0A348AZV6       | BdorGR39b      | A0A0G2UEM7       | BdorIR100a  |
| A0A6M9TYE9       | BcorOR67d_2  | XP036342619      | RpomOR59b_like         | A0A6M9TZ73       | BdorGR5a       | A0A6M9TZA0       | BdorIR21a   |
| A0A6M9TY45       | BcorOR67d_4  | XP036336886      | RpomOR63a_like         | A0A348AZV9       | BdorGR63a      | A0A348AZW9       | BdorIR25a   |
| A0A6M9TY48       | BcorOR69a_1  | XP036336885      | RpomOR63a_like         | A0A348AZW0       | BdorGR64b      | A0A348AZX1       | BdorIR31a_2 |



| ORs              |              |                  |                        | GRs              |                   | IRs              |                   |
|------------------|--------------|------------------|------------------------|------------------|-------------------|------------------|-------------------|
| Accession number | Name         | Accession number | Name                   | Accession number | Name              | Accession number | Name              |
| A0A6M9TY54       | BcorOR69a_2  | XP036336255      | RpomOR63a_like         | A0A6M9TZ21       | BdorGR64e         | A0A0G2UGF8       | BdorIR40a         |
| A0A6M9TY50       | BcorOR74a    | XP036327280      | RpomOR67c_like         | A0A6M9TZP5       | BdorGR64f         | A0A0G2UEM3       | BdorIR41a         |
| A0A6M9TYT0       | BcorOR7a_6   | XP036320221      | RpomOR67c_like         | A0A0G2UES1       | BdorGR68a         | A0A348AZX9       | BdorIR56c_part2   |
| A0A6M9TYW8       | BcorOR7a_7   | XP036325007      | RpomOR67d_like         | A0A348AZW5       | BdorGR98b         | A0A6M9TZR5       | BdorIR64a         |
| A0A6M9TYJ4       | BcorOR7a_8   | XP036337020      | RpomOR67d_like         | A0A5H2WZ00       | BlatGR21a_1       | A0A6M9TZB8       | BdorIR75a_1       |
| A0A6M9TYW5       | BcorOR82a    | XP036345777      | RpomOR69a              | A0A5H2X9T5       | BlatGR21a_2_v1    | A0A6M9TZ05       | BdorIR75a_2       |
| A0A6M9TYZ7       | BcorOR88a    | XP036327298      | RpomOR69a              | A0A0K8WM41       | BlatGr28b         | A0A6M9TZA5       | BdorIR75d         |
| A0A6M9TY89       | BcorOR94b_1  | XP036329321      | RpomOR74a_like         | A0A5H2X0N4       | BlatGR28b_3       | A0A6M9TZA1       | BdorIR76a         |
| A0A6M9TYE0       | BcorOrco     | XP036337022      | RpomOR74a_like         | A0A5H2WWF0       | BlatGR32a_3       | A0A0G2UES7       | BdorIR84a         |
| A0A0G2UKH1       | BdorOR13a    | XP036344417      | RpomOR74a_like         | A0A5H2WZ13       | BlatGR33a         | A0A348AZW8       | BdorIR8a_2        |
| A0A6M9TYV4       | BdorOR19a    | XP036332692      | RpomOR7a_like          | A0A5H2X9U7       | BlatGR39b         | A0A0G2UGG3       | BdorIR92a         |
| A0A034WVI2       | BdorOR22C    | XP036343945      | RpomOR7a_like          | A0A5H2X4L7       | BlatGR43a_1_part1 | A0A6M9TZI6       | BdorIR93a         |
| A0A0G2UGJ8       | BdorOR43a_1  | XP036325270      | RpomOR82a              | A0A5H2X034       | BlatGR43a_1_part2 | A0A5H2WVU9       | BlatIR21a_part1   |
| A0A6M9TZ79       | BdorOR43a_4b | XP036342149      | RpomOR83a              | A0A5H2X0M0       | BlatGR5a_3        | A0A5H2X5R2       | BlatIR25a         |
| A0A0G2UKH6       | BdorOR45a    | XP036326587      | RpomOR85c_like         | A0A5H2WXV9       | BlatGR63a         | A0A5H2X9Z8       | BlatIR41a_v2      |
| A0A348AZR1       | BdorOR47b    | XP036344098      | RpomOR85c_like_partial | A0A5H2X0P4       | BlatGR64a         | A0A5H2X081       | BlatIR64a_1       |
| A0A6M9TYX1       | BdorOR49a    | XP036326958      | RpomOR85d              | A0A5H2X5P1       | BlatGR64b         | A0A5H2X0R6       | BlatIR75a_part2   |
| A0A6M9TZK2       | BdorOR49b    | XP036332705      | RpomOR88a              | A0A5H2WVW8       | BlatGR64c         | A0A5H2X5S7       | BlatIR75b         |
| A0A6M9TYW4       | BdorOR59a_1  | XP036323149      | RpomOR94a              | A0A5H2WZ23       | BlatGR64e_part2   | A0A5H2WVZ7       | BlatIR75d         |
| A0A6M9TYW9       | BdorOR59a_2  | XP036332423      | RpomOR94a_like         | A0A5H2X4M7       | BlatGR64f         | A0A5H2WWJ3       | BlatIR76a         |
| A0A6M9TZE8       | BdorOR63a_1  | XP036332422      | RpomOR94a_like         | A0A5H2X038       | BlatGR66a_part1   | A0A5H2XA15       | BlatIR84a         |
| A0A6M9TZA2       | BdorOR63a_3  | XP036335587      | RpomORCO               | A0A5H2WVT9       | BlatGR66a_part2   | A0A5H2X049       | BlatIR8a          |
| A0A6I9V829       | BdorOR67c    | XP036328946      | RpomOROr2_like         | A0A5H2WXW6       | BlatGR68a         | A0A5H2WXY9       | BlatIR92a_2_part2 |
| A0A6M9TZB1       | BdorOR67c_1  | XP017476238      | RzepOR10a              | A0A5H2X5L3       | BlatGR8a_1_part1  | A0A5H2X5U1       | BlatIR93a_1_part2 |
| A0A348AZS8       | BdorOR67d_1  | XP017466349      | RzepOR13a_like         | A0A5H2X5Q1       | BlatGR94a         | Q9V9T2           | DmelIR100a        |
| A0A6M9TZ83       | BdorOR67d_2  | XP017480983      | RzepOR22c              | W8CDW6           | CcapGR08A         | Q9VPI2           | DmelIR21a         |
| A0A0G2UET3       | BdorOR69a    | XP017483268      | RzepOR24a              | W8CE61           | CcapGR21A         | Q9VR32           | DmelIR25a         |

| ORs              |                |                  |                        | GRs              |           | IRs              |                           |
|------------------|----------------|------------------|------------------------|------------------|-----------|------------------|---------------------------|
| Accession number | Name           | Accession number | Name                   | Accession number | Name      | Accession number | Name                      |
| A0A6M9TZ90       | BdorOR69a_2    | XP017490054      | RzepOR2a_like_partial  | W8CBK6           | CcapGR22  | Q8IPB8           | DmelIR31a                 |
| A0A6I9UZ81       | BdorOR74a      | XP017483288      | RzepOR33b_like         | W8C773           | CcapGR32A | X2JAN0           | DmelIR40a                 |
| A0A6M9TZG0       | BdorOR74a      | XP017490193      | RzepOR33b_like         | W8BZD0           | CcapGR94A | A1Z6D6           | DmelIR41a                 |
| A0A0G2UEW4       | BdorOR7a_2     | XP017486793      | RzepOR33b_like         | Q9VPT1           | DmelGR21a | A1ZBM8           | DmelIR56c                 |
| A0A6M9TZ82       | BdorOR7a_6     | XP017483527      | RzepOR42b_like         | P58951           | DmelGR22a | Q9VRL4           | DmelIR64a                 |
| A0A6M9TZ91       | BdorOR7a_7     | XP017479408      | RzepOR43a              | P84181           | DmelGR22d | Q9VVL1           | DmelIR75a                 |
| A0A6M9TZ69       | BdorOR7a_8     | XP017494799      | RzepOR47a_like_partial | P58953           | DmelGR22e | Q9VVU7           | DmelIR75d                 |
| A0A348AZT7       | BdorOR82a      | XP017471040      | RzepOR47b              | Q9VM09           | DmelGR28a | B7Z084           | DmelIR76a                 |
| A0A6I9UZ10       | BdorOR83a_like | XP017477474      | RzepOR49a_partial      | Q9VM08           | DmelGR28b | Q9W3P2           | DmelIR7c                  |
| A0A0G2UKI5       | BdorOR88a      | XP017475280      | RzepOR49b_isoform_X2   | E1JJC5           | DmelGR2a  | Q9VIA5           | DmelIR84a                 |
| A0A348AZU2       | BdorOR94b_1    | XP017476444      | RzepOR59a_like         | Q9VKJ7           | DmelGR32a | E9NA95           | DmelIR8a                  |
| A0A6M9TZU6       | BdorOR94b_2    | XP017487642      | RzepOR59a_like         | P58960           | DmelGR39b | Q9VDN3           | DmelIR92a                 |
| A0A5H2WXQ9       | BlatOR10a      | XP017488345      | RzepOR63a              | Q0E9G8           | DmelGR43a | Q9VDH6           | DmelIR93a                 |
| A0A5H2X0I7       | BlatOR13a      | XP017484939      | RzepOR63a_like         | Q9W497           | DmelGR5a  | NP650925         | DmelKainate-IGR1D         |
| A0A5H2WZW7       | BlatOR2a_v1    | XP017487849      | RzepOR67c_like         | Q9VZL7           | DmelGR63a | XP036341412      | RpomGRIK2_like            |
| A0A5H2X9M7       | BlatOR42b      | XP017461882      | RzepOR67c_like_partial | D7F9T2           | DmelGR64a | XP036341411      | RpomGRIK2_like            |
| A0A5H2X4G3       | BlatOR43a_1_v1 | XP017473047      | RzepOR67d_like         | D7F9V2           | DmelGR64b | XP036342815      | RpomGRIK2 likeIsoform X1  |
| A0A5H2X4H2       | BlatOR59a      | XP017468648      | RzepOR67d_like         | D7F9X8           | DmelGR64c | XP036342817      | RpomGRIK2_like_isoform_X2 |
| A0A5H2WXS8       | BlatOR63a_2    | XP017471579      | RzepOR69a              | Q9VZJ6           | DmelGR64d | XP036329707      | RpomIR21a                 |
| A0A5H2X0K6       | BlatOR63a_3    | XP017465320      | RzepOR69a              | P83296           | DmelGR64e | XP036324538      | RpomIR25a                 |
| A0A5H2WWC4       | BlatOR67d_1    | XP017490047      | RzepOR74a              | P83297           | DmelGR64f | XP036327744      | RpomIR25a                 |
| A0A5H2X9Q8       | BlatOR67d_3_v1 | XP017469217      | RzepOR74a_like         | D7FA04           | DmelGR66a | XP036322623      | RpomIR40a                 |
| A0A5H2WVQ3       | BlatOR69a_1    | XP017473159      | RzepOR74a_like         | Q9VTN0           | DmelGR68a | XP036327586      | RpomIR75a                 |
| A0A5H2WXT7       | BlatOR69a_2    | XP017461213      | RzepOR7a_like          | Q9W367           | DmelGR8a  | XP036327349      | RpomIR75a_like            |
| A0A5H2X0K9       | BlatOR74a_1    | XP017474398      | RzepOR7a_like          | D7FAK6           | DmelGR94a | XP036323735      | RpomIR93a                 |
| A0A5H2WXQ4       | BlatOR7a_1     | XP017493400      | RzepOR7a_like          | D7FAQ2           | DmelGR98a | XP036320037      | RpomIRdelta1              |
| A0A5H2WVM4       | BlatOR7a_4     | XP017481537      | RzepOR82a              | D7FAW4           | DmelGR98b | A0A6M9TZQ6       | ZtauIR21a                 |

| ORs              |               |                  |                  | GRs              |                      | IRs              |             |
|------------------|---------------|------------------|------------------|------------------|----------------------|------------------|-------------|
| Accession number | Name          | Accession number | Name             | Accession number | Name                 | Accession number | Name        |
| A0A5H2WVS1       | BlatOR82a     | XP017478187      | RzepOR83a        | XP036334006      | RpomGR21a_like       | A0A6M9TYJ3       | ZtauIR21a   |
| A0A5H2WYX0       | BlatOR88a     | XP017482230      | RzepOR85b_like   | XP036329742      | RpomGR22d            | A0A6M9TZV6       | ZtauIR25a   |
| A0A5H2X4E1       | BlatORCO      | XP017472634      | RzepOR85d        | XP036329741      | RpomGR22e_like       | A0A5H2WWB5       | ZtauIR25a   |
| A0A3G2LEL1       | BminOR1_1     | XP017469100      | RzepOR88a        | XP036328377      | RpomGR28a            | A0A5H2WWT0       | ZtauIR31a   |
| A0A3G2LEI5       | BminOR10a     | XP017464263      | RzepOR94a_like   | XP036328378      | RpomGR28b            | A0A6M9TZL7       | ZtauIR40a   |
| A0A3G2LEI3       | BminOR22c     | XP017485906      | RzepOR94a_like   | XP036329791      | RpomGR28b            | A0A6M9TYJ6       | ZtauIR40a   |
| A0A7D4V5V3       | BminOR24      | XP017470946      | RzepORisoform_X1 | XP036338634      | RpomGR2a             | A0A6M9TzM1       | ZtauIR41a   |
| A0A3G2LEI9       | BminOR24a     | XP017483505      | RzepOROr2_like   | XP036329340      | RpomGR32a_isoform_X1 | A0A6M9TZ93       | ZtauIR41a   |
| A0A3G2LEI4       | BminOR2a      | A0A6M9TYJ2       | ZcucOR10a        | XP036328013      | RpomGR32a_like       | A0A6M9TZK7       | ZtauIR64a   |
| A0A3G2LEI7       | BminOR33ab1_1 | A0A6M9TYQ4       | ZcucOR13a_1      | XP036340902      | RpomGR33a_like       | A0A6M9TZF2       | ZtauIR64a   |
| A0A3G2LEM2       | BminOR4_1     | A0A6M9TYG5       | ZcucOR19a        | XP036338635      | RpomGR39b            | A0A6M9U083       | ZtauIR75a_1 |
| A0A3G2LEJ6       | BminOR43a     | A0A6M9TYH0       | ZcucOR22c        | XP036334658      | RpomGR43a_like       | A0A6M9TZ16       | ZtauIR75a_1 |
| A0A3G2LEJ8       | BminOR45a1    | A0A6M9TYF3       | ZcucOR42a        | XP036337263      | RpomGR5a             | A0A6M9U0I3       | ZtauIR75a_2 |
| A0A3G2LEJ2       | BminOR47b     | A0A5H2XA80       | ZcucOR42b        | XP036337481      | RpomGR63a            | A0A6M9TYN7       | ZtauIR75a_2 |
| A0A3G2LEJ9       | BminOR49a     | A0A5H2X4U4       | ZcucOR43a_1      | XP036337008      | RpomGR64a            | A0A6M9TZX6       | ZtauIR75d   |
| A0A6N0A5L8       | BminOR5       | A0A5H2X0B3       | ZcucOR43a_2      | XP036337006      | RpomGR64b            | A0A6M9TYV6       | ZtauIR75d   |
| A0A3G2LEM6       | BminOR5_1     | A0A6M9TYK5       | ZcucOR45a        | XP036337005      | RpomGR64c            | A0A6M9TZN0       | ZtauIR76a   |
| A0A3G2LEM7       | BminOR5_2     | A0A5H2X0V3       | ZcucOR47b_v1     | XP036337010      | RpomGR64e_like       | A0A5H2X0I4       | ZtauIR76a   |
| A0A3G2LEJ7       | BminOR63a1_1  | A0A6M9TYH8       | ZcucOR49a        | XP036337262      | RpomGR64f_like       | A0A6M9TZV9       | ZtauIR84a   |
| A0A3G2LEK5       | BminOR67c     | A0A6M9TYI5       | ZcucOR49b        | XP036345248      | RpomGR8a_like        | A0A6M9TYM2       | ZtauIR84a   |
| A0A3G2LEK4       | BminOR67d1    | A0A6M9TYG9       | ZcucOR59a_1      | XP036323157      | RpomGR94a_isoform_X1 | A0A6M9TZU0       | ZtauIR8a    |
| A0A3G2LEK7       | BminOR71a     | A0A6M9TYG6       | ZcucOR59a_2      | XP036323158      | RpomGR97a_isoform_X2 | A0A6M9TYL1       | ZtauIR8a    |
| A0A3G2LEK9       | BminOR74a2    | A0A5H2X0W1       | ZcucOR63a_2      | XP036325256      | RpomGR98a            | A0A6M9TZR6       | ZtauIR92a   |
| A0A3G2LEI8       | BminOR7a1     | A0A6M9TYZ1       | ZcucOR67c_1      | XP036325255      | RpomGR98b            | A0A6M9TYK6       | ZtauIR92a   |
| A0A3G2LEI1       | BminOR7a2     | A0A6M9TYT5       | ZcucOR67d_2      | XP036338271      | RpomGRfor66a         | A0A6M9TzM7       | ZtauIR93a   |
| A0A3G2LEK6       | BminOR82a     | A0A6M9TYJ1       | ZcucOR67d_4      | A0A5H2WZF1       | ZcucGR21a_1_v1       | A0A6M9TYK7       | ZtauIR93a   |
| A0A3G2LEL5       | BminOR83a1    | A0A5H2X603       | ZcucOR69a_1      | A0A6M9TZB2       | ZcucGR22             |                  |             |

| ORs              |             |                  |             | GRs              |                 | IRs              |      |
|------------------|-------------|------------------|-------------|------------------|-----------------|------------------|------|
| Accession number | Name        | Accession number | Name        | Accession number | Name            | Accession number | Name |
| A0A3G2LEL9       | BminOR85d2  | A0A6M9TYI1       | ZcucOR69a_2 | A0A5H2X0E9       | ZcucGR22d       |                  |      |
| A0A3G2LEL4       | BminOR88a   | A0A5H2WWQ2       | ZcucOR74a   | A0A5H2WY49       | ZcucGR28a       |                  |      |
| A0A3G2LEL3       | BminORCO    | A0A5H2X094       | ZcucOR7a_1  | A0A5H2X110       | ZcucGR28b       |                  |      |
| W8C1I4           | CcapOR59B   | A0A6M9TZA7       | ZcucOR7a_7  | A0A6M9TZ35       | ZcucGR32a_1     |                  |      |
| W8BXK2           | CcapOR83B   | A0A6M9TZ86       | ZcucOR82a   | A0A6M9TYR0       | ZcucGR63a       |                  |      |
| W8AKN0           | CcapOR85B   | A0A6M9TZ06       | ZcucOR88a   | A0A5H2WZF8       | ZcucGR64b_part1 |                  |      |
| ADK48058         | DemlOR7a    | A0A6M9TYU6       | ZcucOR94b_1 | A0A5H2XAD8       | ZcucGR64b_part2 |                  |      |
| ADK48058         | DemlOR7a    | A0A6M9TYY3       | ZcucOR94b_2 | A0A6M9TYX0       | ZcucGR64e       |                  |      |
| E2E5B5           | DmelOR10a   | A0A0A1WPI9       | ZcucOrco    | A0A5H2X0F6       | ZcucGR64f       |                  |      |
| Q9VXL0           | DmelOR13a   | A0A6M9TZT8       | ZtauOR10a   | A0A5H2WWQ8       | ZcucGR8a        |                  |      |
| P81911           | DmelOR22c   | A0A6M9TZJ2       | ZtauOR13a_1 | A0A5H2WY56       | ZcucGR94a       |                  |      |
| P81913           | DmelOR24a   | A0A6M9TZT0       | ZtauOR19a   | A0A6M9TZN7       | ZtauGR21a       |                  |      |
| D3PK91           | DmelOR2a_RA | A0A6M9TZL6       | ZtauOR22c   | A0A6M9TZN8       | ZtauGR22        |                  |      |
| P81914           | DmelOR33a   | A0A6M9TZI9       | ZtauOR42a   | A0A6M9U0B0       | ZtauGR32a_1     |                  |      |
| P81915           | DmelOR33b   | A0A6M9TZJ9       | ZtauOR43a_1 | A0A6M9U0L0       | ZtauGR63a       |                  |      |
| ADK48356         | DmelOR43a   | A0A6M9U0G5       | ZtauOR43a_4 | A0A6M9U014       | ZtauGR64e       |                  |      |
| Q9V568           | DmelOR45a   | A0A6M9TZU8       | ZtauOR45a   |                  |                 |                  |      |
| P81922           | DmelOR47b   | A0A6M9TZS1       | ZtauOR47b   |                  |                 |                  |      |
| Q9V6A9           | DmelOR49a   | A0A6M9TZT9       | ZtauOR49a   |                  |                 |                  |      |
| Q9V6H2           | DmelOR49b   | A0A6M9TZM9       | ZtauOR49b   |                  |                 |                  |      |
| NP523821         | DmelOR59a   | A0A6M9TZK1       | ZtauOR59a_1 |                  |                 |                  |      |
| E5AJF0           | DmelOR63a   | A0A6M9TZK5       | ZtauOR59a_2 |                  |                 |                  |      |
| D7F8L2           | DmelOR67c   | A0A6M9TZJ3       | ZtauOR63a_1 |                  |                 |                  |      |
| D7F8B2           | DmelOR69a   | A0A6M9U064       | ZtauOR67c_1 |                  |                 |                  |      |
| D7F8C7           | DmelOR71a   | A0A6M9TZV3       | ZtauOR67d_2 |                  |                 |                  |      |
| D7F8F4           | DmelOR74a   | A0A6M9TZT2       | ZtauOR67d_4 |                  |                 |                  |      |
| D7F8N0           | DmelOR82a   | A0A6M9TZU3       | ZtauOR69a_1 |                  |                 |                  |      |

| ORs              |                |                  |             | GRs              |      | IRs              |      |
|------------------|----------------|------------------|-------------|------------------|------|------------------|------|
| Accession number | Name           | Accession number | Name        | Accession number | Name | Accession number | Name |
| D7F8U6           | DmelOR83a      | A0A6M9TZP3       | ZtauOR69a_2 |                  |      |                  |      |
| D7F8X2           | DmelOR83b      | A0A6M9TZK8       | ZtauOR74a   |                  |      |                  |      |
| D7F954           | DmelOR85b      | A0A6M9TZH6       | ZtauOR7a_6  |                  |      |                  |      |
| D7F9R4           | DmelOR85c      | A0A6M9U033       | ZtauOR7a_7  |                  |      |                  |      |
| D7F960           | DmelOR85d      | A0A6M9U0D8       | ZtauOR7a_8  |                  |      |                  |      |
| D7F9D7           | DmelOR88a      | A0A6M9TZL4       | ZtauOR82a   |                  |      |                  |      |
| D7F9J6           | DmelOR94a      | A0A6M9TZK0       | ZtauOR85c   |                  |      |                  |      |
| XP036333231      | RpomOR10a      | A0A6M9U071       | ZtauOR88a   |                  |      |                  |      |
| XP036345084      | RpomOR13a_like | A0A6M9TZW3       | ZtauOR94b_1 |                  |      |                  |      |
| XP036328669      | RpomOR22c      | A0A6M9TZL9       | ZtauOR94b_2 |                  |      |                  |      |
| XP036347045      | RpomOR24a_like | A0A6M9TZO0       | ZtauOrco    |                  |      |                  |      |
| XP036345750      | RpomOR2a_like  |                  |             |                  |      |                  |      |

ORs: Odorant Receptors; GRs: Gustatory Receptors; IRs: Ionotropic Receptors

**Table S11.** Evolutionary models chosen by the BIC criterion for phylogenetic analyses of the six chemosensory protein families.

| Chemosensory Protein Family |                                    | Evolutionary models |
|-----------------------------|------------------------------------|---------------------|
| <b>Non<br/>Receptor</b>     | Odorant Binding Proteins           | WAG+I+G4            |
|                             | Chemosensory Proteins              | LG+G4               |
|                             | Sensory Neuronal Membrane Proteins | LG+I+G4             |
| <b>Receptor</b>             | Odorant Receptors                  | JTT+G4+F            |
|                             | Gustatory Receptors                | VT+G4+F             |
|                             | Ionotrópico Receptors              | VT+G4+F             |
